# Supplementary material for: Assembly of a series of d10 coordination polymers based on W-shaped 1,3-di(2′,4′-dicarboxyphenyl)benzene: from syntheses, structural diversity, luminescence, to photocatalytic properties
Source: Royal Society of Chemistry journal article supplement (doi:10.1039/c5ce01157d), 2015-01-01
Supplement: c5ce01157d1.pdf [file c5ce01157d1.pdf]

Electronic Supplementary Information (ESI) for CEC

# Assembly of A Series of $d^{10}$ Coordination Polymers Based on W-shaped 1,3-Di(2',4'-dicarboxylphenyl)benzene: From Syntheses, Structural Diversity, Luminescence, to Photocatalytic Properties

Xiutang Zhang,<sup>\*a,b</sup> Liming Fan,<sup>a,b</sup> Weiliu Fan,<sup>b</sup> Bin Li<sup>a</sup> and Xian Zhao<sup>\*b</sup>

<sup>a</sup> Advanced Material Institute of Research, College of Chemistry and Chemical Engineering, Qilu Normal University, Jinan, 250013, China.

<sup>b</sup> State Key Laboratory of Crystal Materials, Shandong University, Jinan 250100, China.

E-mail: xiutangzhang@163.com (X.Z.); zhaoxian@sdu.edu.cn (X. Zhao).

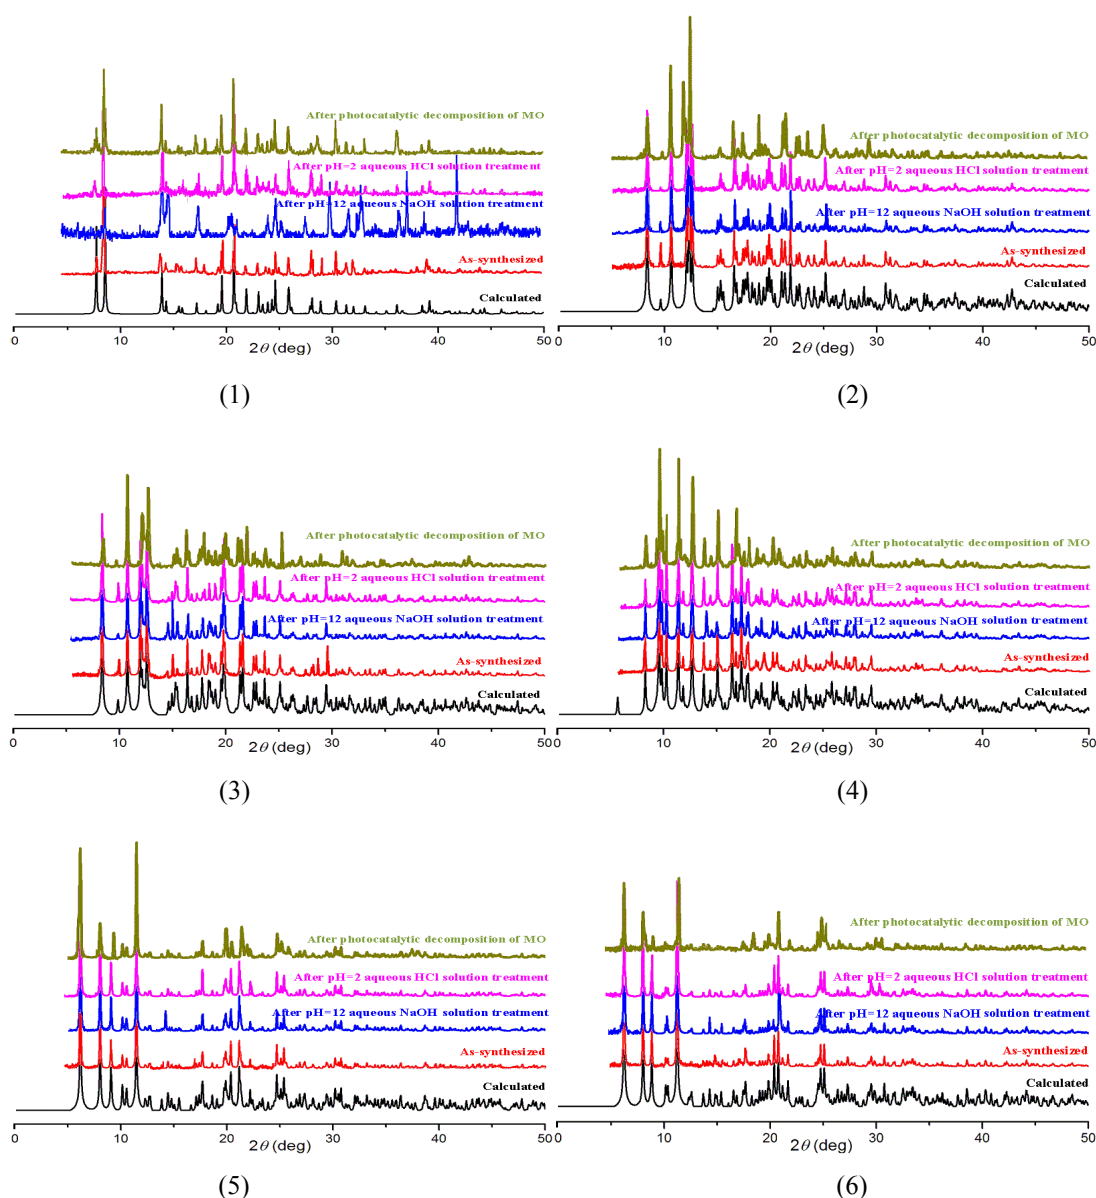

Figure S1. PXRD patterns of complexes 1-6 under different conditions treatment.

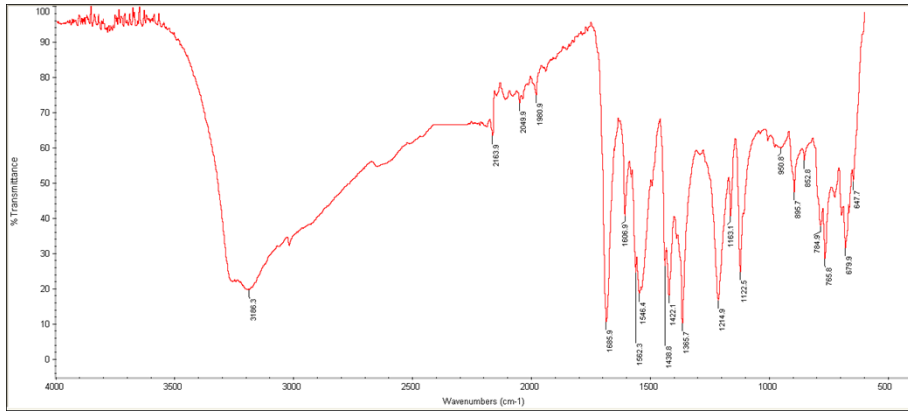

(1)

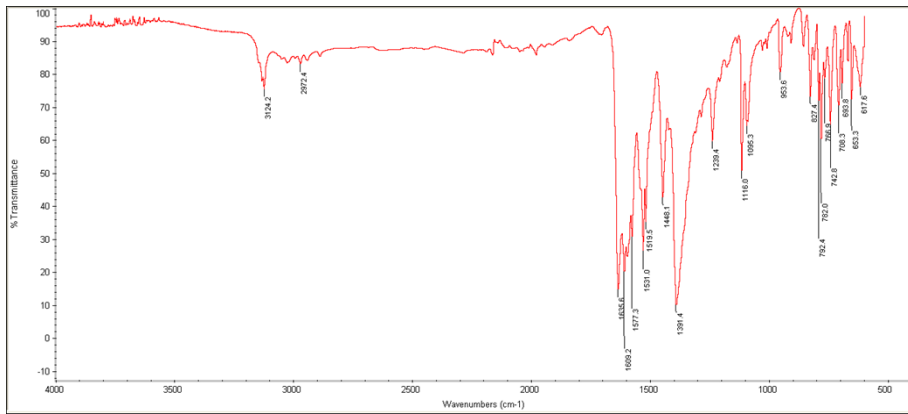

(2)

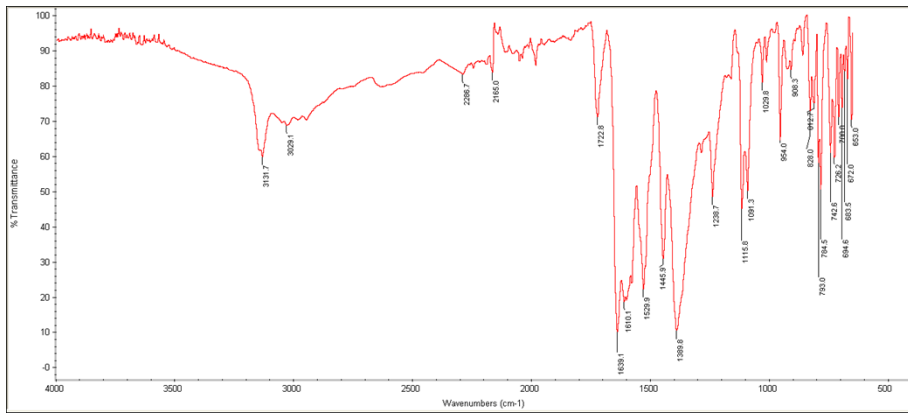

(3)

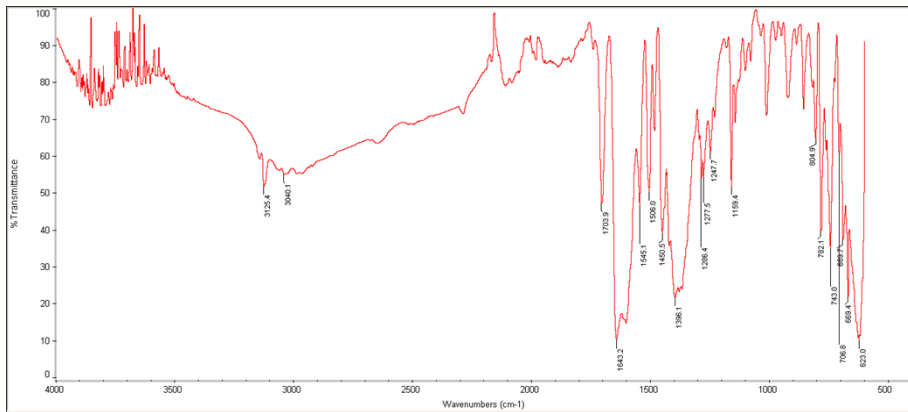

(4)

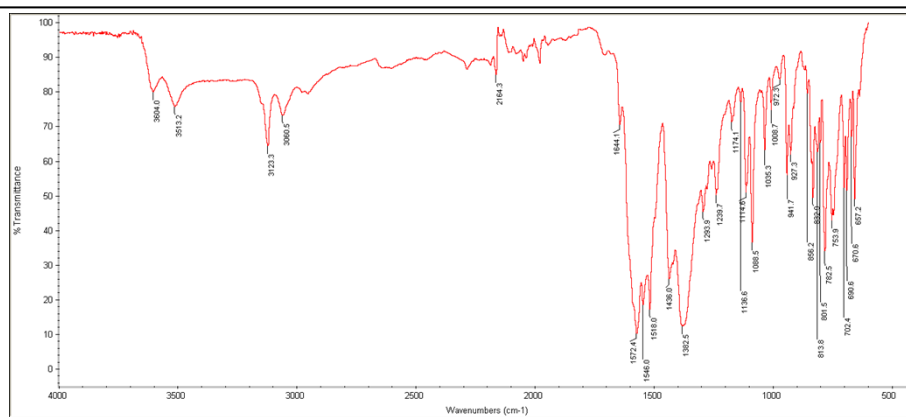

(5)

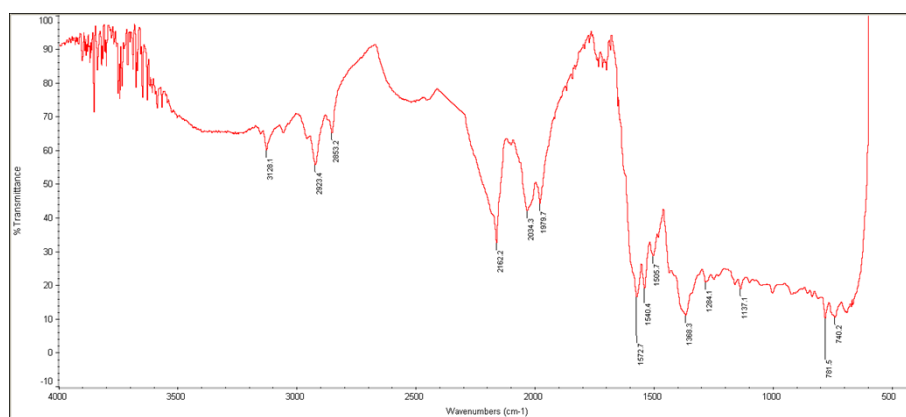

(6)

**Figure S2.** The IR spectras of complexes 1-6.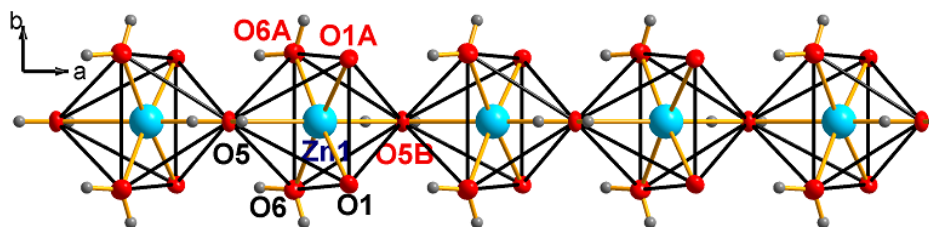**Figure S3.** The water molecules bridged 1D chain view along *c* direction.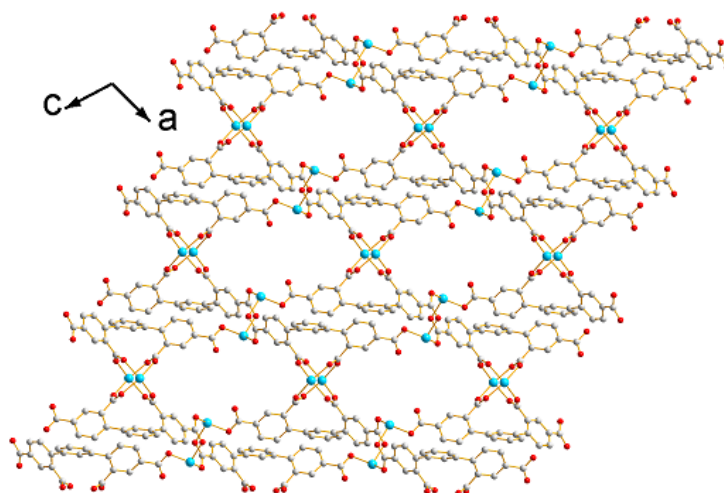**Figure S4.** The 3D [Zn<sub>2</sub>(DDB)]<sub>n</sub> net view along *b* axis in complex 2.

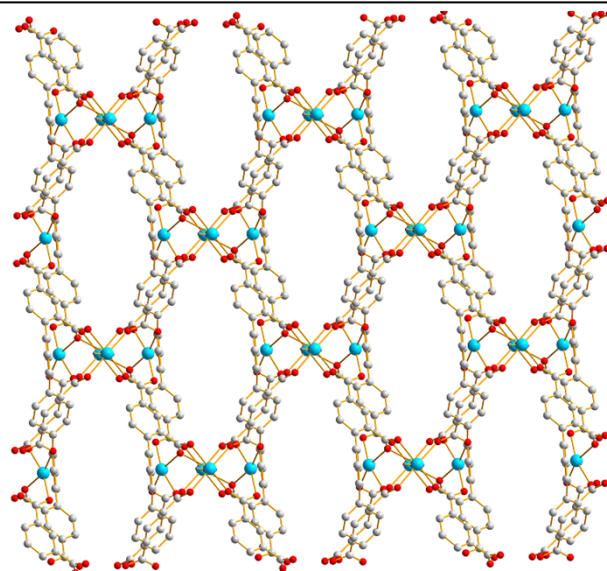

**Figure S5.** The 3D  $[\text{Cd}_2(\text{DDB})]_n$  net view along  $b$  axis in complex 5.

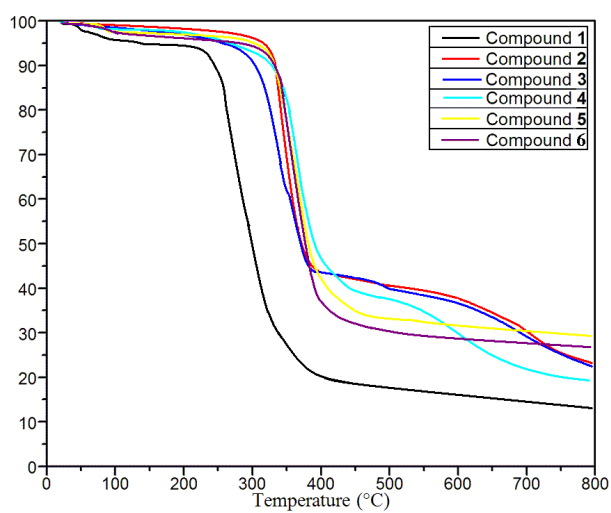

**Figure S6.** TGA curves for compounds 1–6.

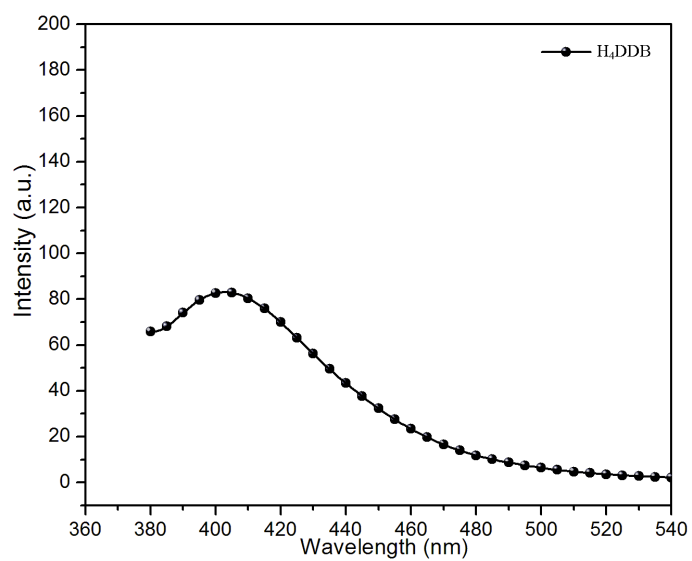

**Figure S7.** Emissions pectra of  $\text{H}_4\text{DDB}$  in the solid state at room temperature.

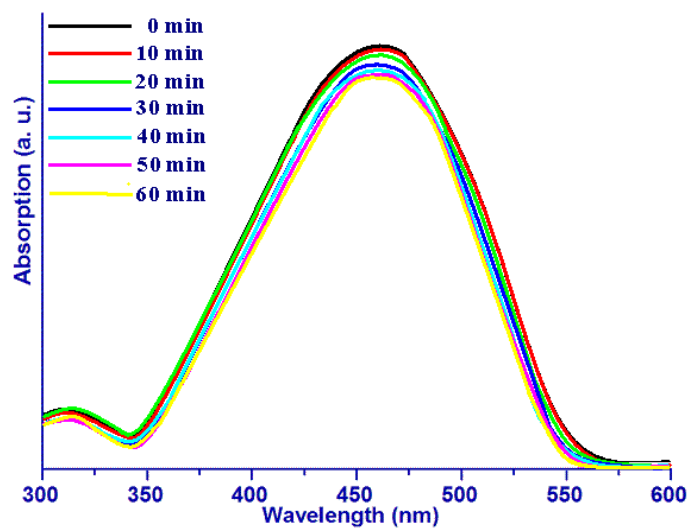

**Figure S8.** UV-Vis absorption spectra of the MO solutions degraded without photocatalysts.

**Table S1** Selected bond lengths (Å) and angles (°) for **1–6**.

|                                                                                                                                                                                                                                                                                                                             |            |                                               |            |                                               |            |                                              |            |
|-----------------------------------------------------------------------------------------------------------------------------------------------------------------------------------------------------------------------------------------------------------------------------------------------------------------------------|------------|-----------------------------------------------|------------|-----------------------------------------------|------------|----------------------------------------------|------------|
| <b>Complex 1</b>                                                                                                                                                                                                                                                                                                            |            |                                               |            |                                               |            |                                              |            |
| Zn(1)-O(6)                                                                                                                                                                                                                                                                                                                  | 2.0406(17) | Zn(1)-O(1)                                    | 2.0808(16) | Zn(1)-O(5)                                    | 2.152(2)   | O(6) <sup>#1</sup> -Zn(1)-O(5)               | 87.51(7)   |
| O(6)-Zn(1)-O(6) <sup>#1</sup>                                                                                                                                                                                                                                                                                               | 96.04(10)  | O(6) <sup>#1</sup> -Zn(1)-O(1)                | 174.26(7)  | O(1) <sup>#1</sup> -Zn(1)-O(5) <sup>#2</sup>  | 93.67(7)   | O(1) <sup>#1</sup> -Zn(1)-O(5)               | 93.12(7)   |
| O(6)-Zn(1)-O(1) <sup>#1</sup>                                                                                                                                                                                                                                                                                               | 174.26(7)  | O(1) <sup>#1</sup> -Zn(1)-O(1)                | 84.58(9)   | O(1)-Zn(1)-O(5) <sup>#2</sup>                 | 93.67(7)   | O(1)-Zn(1)-O(5)                              | 93.12(7)   |
| O(6) <sup>#1</sup> -Zn(1)-O(1) <sup>#1</sup>                                                                                                                                                                                                                                                                                | 89.69(7)   | O(6)-Zn(1)-O(5) <sup>#2</sup>                 | 86.35(7)   | O(6)-Zn(1)-O(5)                               | 87.51(7)   | O(5) <sup>#2</sup> -Zn(1)-O(5)               | 170.81(6)  |
| O(6)-Zn(1)-O(1)                                                                                                                                                                                                                                                                                                             | 89.69(7)   | O(6) <sup>#1</sup> -Zn(1)-O(5) <sup>#2</sup>  | 86.35(7)   | O(1) <sup>#1</sup> -Zn(1)-O(5) <sup>#2</sup>  | 93.67(7)   |                                              |            |
| Symmetry codes: #1 <i>x</i> , - <i>y</i> +3/2, <i>z</i> ; #2 <i>x</i> +1/2, <i>y</i> , - <i>z</i> +1/2.                                                                                                                                                                                                                     |            |                                               |            |                                               |            |                                              |            |
| <b>Complex 2</b>                                                                                                                                                                                                                                                                                                            |            |                                               |            |                                               |            |                                              |            |
| N(1)-Zn(2)                                                                                                                                                                                                                                                                                                                  | 1.992(5)   | O(5)-Zn(1)                                    | 2.046(3)   | Zn(1)-O(3) <sup>#2</sup>                      | 2.066(3)   | Zn(2)-O(7) <sup>#5</sup>                     | 1.970(4)   |
| O(2)-Zn(2)                                                                                                                                                                                                                                                                                                                  | 1.963(3)   | Zn(1)-N(4) <sup>#1</sup>                      | 1.984(4)   | Zn(1)-O(6) <sup>#2</sup>                      | 2.059(3)   | Zn(2)-O(8) <sup>#6</sup>                     | 2.077(3)   |
| O(4)-Zn(1)                                                                                                                                                                                                                                                                                                                  | 2.029(3)   | O(2)-Zn(2)-N(1)                               | 109.17(17) | N(4) <sup>#1</sup> -Zn(1)-O(4)                | 102.97(15) | N(4) <sup>#1</sup> -Zn(1)-O(5)               | 102.02(15) |
| O(4)-Zn(1)-O(5)                                                                                                                                                                                                                                                                                                             | 87.49(14)  | O(4)-Zn(1)-O(3) <sup>#2</sup>                 | 158.96(14) | O(5)-Zn(1)-Zn(1) <sup>#2</sup>                | 72.45(10)  | O(7) <sup>#5</sup> -Zn(2)-N(1)               | 108.26(17) |
| N(4) <sup>#1</sup> -Zn(1)-O(6) <sup>#2</sup>                                                                                                                                                                                                                                                                                | 98.91(15)  | O(5)-Zn(1)-O(3) <sup>#2</sup>                 | 89.18(14)  | O(6) <sup>#2</sup> -Zn(1)-Zn(1) <sup>#2</sup> | 86.59(10)  | O(2)-Zn(2)-O(8) <sup>#6</sup>                | 95.27(14)  |
| O(4)-Zn(1)-O(6) <sup>#2</sup>                                                                                                                                                                                                                                                                                               | 89.09(15)  | O(6) <sup>#2</sup> -Zn(1)-O(3) <sup>#2</sup>  | 86.63(15)  | O(3) <sup>#2</sup> -Zn(1)-Zn(1) <sup>#2</sup> | 80.04(10)  | O(7) <sup>#5</sup> -Zn(2)-O(8) <sup>#6</sup> | 104.19(14) |
| O(5)-Zn(1)-O(6) <sup>#2</sup>                                                                                                                                                                                                                                                                                               | 159.03(14) | N(4) <sup>#1</sup> -Zn(1)-Zn(1) <sup>#2</sup> | 174.09(11) | O(2)-Zn(2)-O(7) <sup>#5</sup>                 | 133.81(17) | N(1)-Zn(2)-O(8) <sup>#6</sup>                | 99.59(16)  |
| N(4) <sup>#1</sup> -Zn(1)-O(3) <sup>#2</sup>                                                                                                                                                                                                                                                                                | 98.04(15)  | O(4)-Zn(1)-Zn(1) <sup>#2</sup>                | 79.15(10)  |                                               |            |                                              |            |
| Symmetry codes: #1 - <i>x</i> +2, - <i>y</i> +1, - <i>z</i> +2; #2 - <i>x</i> +2, - <i>y</i> +2, - <i>z</i> +2; #3 <i>x</i> -1/2, - <i>y</i> +5/2, <i>z</i> +1/2; #4 - <i>x</i> +3/2, <i>y</i> +1/2, - <i>z</i> +3/2; #5 <i>x</i> +1/2, - <i>y</i> +5/2, <i>z</i> -1/2; #6 - <i>x</i> +3/2, <i>y</i> -1/2, - <i>z</i> +3/2. |            |                                               |            |                                               |            |                                              |            |
| <b>Complex 3</b>                                                                                                                                                                                                                                                                                                            |            |                                               |            |                                               |            |                                              |            |
| N(1)-Zn(1)                                                                                                                                                                                                                                                                                                                  | 1.991(4)   | O(7)-Zn(1)                                    | 2.082(3)   | Zn(1)-O(1) <sup>#2</sup>                      | 2.046(3)   | Zn(2)-N(4) <sup>#6</sup>                     | 2.001(4)   |
| O(2)-Zn(1)                                                                                                                                                                                                                                                                                                                  | 2.050(3)   | Zn(1)-O(8) <sup>#2</sup>                      | 2.030(3)   | Zn(2)-O(3) <sup>#5</sup>                      | 1.982(3)   | Zn(2)-O(4) <sup>#7</sup>                     | 2.071(3)   |
| O(6)-Zn(2)                                                                                                                                                                                                                                                                                                                  | 1.972(3)   | N(1)-Zn(1)-O(8) <sup>#2</sup>                 | 104.96(16) | N(1)-Zn(1)-O(1) <sup>#2</sup>                 | 99.83(15)  | O(8) <sup>#2</sup> -Zn(1)-O(1) <sup>#2</sup> | 88.10(13)  |
| N(1)-Zn(1)-O(2)                                                                                                                                                                                                                                                                                                             | 101.82(15) | O(8) <sup>#2</sup> -Zn(1)-O(7)                | 158.52(13) | O(6)-Zn(2)-O(3) <sup>#5</sup>                 | 135.39(15) | O(6)-Zn(2)-O(4) <sup>#7</sup>                | 93.28(13)  |
| O(8) <sup>#2</sup> -Zn(1)-O(2)                                                                                                                                                                                                                                                                                              | 88.68(13)  | O(1) <sup>#2</sup> -Zn(1)-O(7)                | 88.21(13)  | O(6)-Zn(2)-N(4) <sup>#6</sup>                 | 109.51(16) | O(3) <sup>#5</sup> -Zn(2)-O(4) <sup>#7</sup> | 105.74(13) |
| O(1) <sup>#2</sup> -Zn(1)-O(2)                                                                                                                                                                                                                                                                                              | 158.21(13) | O(2)-Zn(1)-O(7)                               | 86.94(13)  | O(3) <sup>#5</sup> -Zn(2)-N(4) <sup>#6</sup>  | 104.77(17) | N(4) <sup>#6</sup> -Zn(2)-O(4) <sup>#7</sup> | 103.43(15) |
| N(1)-Zn(1)-O(7)                                                                                                                                                                                                                                                                                                             | 96.52(16)  |                                               |            |                                               |            |                                              |            |
| Symmetry codes: #2 - <i>x</i> +1, - <i>y</i> +1, - <i>z</i> ; #5 <i>x</i> -1/2, - <i>y</i> +1/2, <i>z</i> +1/2; #6 <i>x</i> , <i>y</i> +1, <i>z</i> ; #7 - <i>x</i> +3/2, <i>y</i> +1/2, - <i>z</i> +1/2.                                                                                                                   |            |                                               |            |                                               |            |                                              |            |
| <b>Complex 4</b>                                                                                                                                                                                                                                                                                                            |            |                                               |            |                                               |            |                                              |            |
| N(1)-Zn(1)                                                                                                                                                                                                                                                                                                                  | 2.002(4)   | O(4)-Zn(1)                                    | 2.067(3)   | O(10)-Zn(2)                                   | 2.068(3)   | O(16)-Zn(3)                                  | 1.975(4)   |
| N(4)-Zn(4)                                                                                                                                                                                                                                                                                                                  | 1.978(5)   | O(5)-Zn(2)                                    | 2.039(3)   | O(13)-Zn(2)                                   | 2.028(3)   | Cl(1)-Zn(3)                                  | 2.232(2)   |
| N(5)-Zn(3)                                                                                                                                                                                                                                                                                                                  | 2.015(5)   | O(6)-Zn(1)                                    | 2.051(3)   | O(14)-Zn(1)                                   | 2.038(3)   | Zn(1)-Zn(2)                                  | 3.0466(8)  |
| N(7)-Zn(2)                                                                                                                                                                                                                                                                                                                  | 2.005(4)   | O(9)-Zn(1)                                    | 2.073(3)   | O(15)-Zn(4)                                   | 1.927(4)   | Zn(3)-O(2) <sup>#5</sup>                     | 1.967(4)   |
| O(3)-Zn(2)                                                                                                                                                                                                                                                                                                                  | 2.038(3)   | Zn(4)-O(8) <sup>#4</sup>                      | 1.934(5)   | Zn(4)-O(1) <sup>#5</sup>                      | 1.980(4)   | N(1)-Zn(1)-O(14)                             | 105.64(14) |
| N(1)-Zn(1)-O(6)                                                                                                                                                                                                                                                                                                             | 95.18(15)  | N(7)-Zn(2)-O(13)                              | 97.84(14)  | O(3)-Zn(2)-O(10)                              | 85.69(14)  | O(15)-Zn(4)-O(8) <sup>#4</sup>               | 101.18(19) |
| O(14)-Zn(1)-O(6)                                                                                                                                                                                                                                                                                                            | 92.01(14)  | N(7)-Zn(2)-O(3)                               | 99.72(14)  | O(5)-Zn(2)-O(10)                              | 152.06(15) | O(15)-Zn(4)-N(4)                             | 110.65(18) |
| N(1)-Zn(1)-O(4)                                                                                                                                                                                                                                                                                                             | 103.02(14) | O(13)-Zn(2)-O(3)                              | 161.87(14) | O(2) <sup>#5</sup> -Zn(3)-O(16)               | 118.32(18) | O(8) <sup>#4</sup> -Zn(4)-N(4)               | 135.9(2)   |
| O(14)-Zn(1)-O(4)                                                                                                                                                                                                                                                                                                            | 151.33(14) | N(7)-Zn(2)-O(5)                               | 103.91(15) | O(2) <sup>#5</sup> -Zn(3)-N(5)                | 96.08(18)  | O(15)-Zn(4)-O(1) <sup>#5</sup>               | 119.55(17) |
| O(6)-Zn(1)-O(4)                                                                                                                                                                                                                                                                                                             | 86.09(14)  | O(13)-Zn(2)-O(5)                              | 92.16(14)  | O(16)-Zn(3)-N(5)                              | 103.83(17) | O(8) <sup>#4</sup> -Zn(4)-O(1) <sup>#5</sup> | 94.2(2)    |
| N(1)-Zn(1)-O(9)                                                                                                                                                                                                                                                                                                             | 103.16(15) | O(3)-Zn(2)-O(5)                               | 88.00(14)  | O(2) <sup>#5</sup> -Zn(3)-Cl(1)               | 117.20(15) | N(4)-Zn(4)-O(1) <sup>#5</sup>                | 95.7(2)    |
| O(14)-Zn(1)-O(9)                                                                                                                                                                                                                                                                                                            | 87.32(14)  | N(7)-Zn(2)-O(10)                              | 103.97(16) | O(16)-Zn(3)-Cl(1)                             | 107.53(13) | O(4)-Zn(1)-O(9)                              | 85.52(13)  |
| O(6)-Zn(1)-O(9)                                                                                                                                                                                                                                                                                                             | 161.14(15) | O(13)-Zn(2)-O(10)                             | 85.72(14)  | N(5)-Zn(3)-Cl(1)                              | 112.58(16) |                                              |            |
| Symmetry code: #4 - <i>x</i> +1, - <i>y</i> +2, - <i>z</i> ; #5 <i>x</i> -1/2, - <i>y</i> +3/2, <i>z</i> -1/2.                                                                                                                                                                                                              |            |                                               |            |                                               |            |                                              |            |
| <b>Complex 5</b>                                                                                                                                                                                                                                                                                                            |            |                                               |            |                                               |            |                                              |            |
| Cd(1)-N(3)                                                                                                                                                                                                                                                                                                                  | 2.212(13)  | Cd(1)-O(5)                                    | 2.306(10)  | Cd(2)-O(3) <sup>#5</sup>                      | 2.256(10)  | Cd(2)-O(2)                                   | 2.297(10)  |
| Cd(1)-O(8) <sup>#3</sup>                                                                                                                                                                                                                                                                                                    | 2.249(10)  | Cd(1)-O(4) <sup>#4</sup>                      | 2.324(10)  | Cd(2)-O(7) <sup>#6</sup>                      | 2.261(10)  | Cd(2)-O(5)                                   | 2.333(9)   |
| Cd(1)-O(1)                                                                                                                                                                                                                                                                                                                  | 2.272(10)  | Cd(1)-O(6)                                    | 2.462(10)  | Cd(2)-N(1)                                    | 2.269(12)  | N(3)-Cd(1)-O(8) <sup>#3</sup>                | 98.9(4)    |
| N(3)-Cd(1)-O(1)                                                                                                                                                                                                                                                                                                             | 88.5(4)    | O(5)-Cd(1)-O(4) <sup>#4</sup>                 | 87.8(4)    | O(8) <sup>#3</sup> -Cd(1)-O(4) <sup>#4</sup>  | 86.0(4)    | O(3) <sup>#5</sup> -Cd(2)-O(2)               | 91.7(4)    |
| O(8) <sup>#3</sup> -Cd(1)-O(1)                                                                                                                                                                                                                                                                                              | 97.2(4)    | N(3)-Cd(1)-O(6)                               | 85.5(4)    | O(1)-Cd(1)-O(4) <sup>#4</sup>                 | 176.7(4)   | O(7) <sup>#6</sup> -Cd(2)-O(2)               | 168.7(4)   |
| N(3)-Cd(1)-O(5)                                                                                                                                                                                                                                                                                                             | 139.9(4)   | O(8) <sup>#3</sup> -Cd(1)-O(6)                | 174.5(4)   | O(3) <sup>#5</sup> -Cd(2)-O(7) <sup>#6</sup>  | 98.5(4)    | N(1)-Cd(2)-O(2)                              | 99.2(4)    |
| O(8) <sup>#3</sup> -Cd(1)-O(5)                                                                                                                                                                                                                                                                                              | 120.9(4)   | O(1)-Cd(1)-O(6)                               | 86.2(3)    | O(3) <sup>#5</sup> -Cd(2)-N(1)                | 88.2(4)    | O(3) <sup>#5</sup> -Cd(2)-O(5)               | 164.0(4)   |
| O(1)-Cd(1)-O(5)                                                                                                                                                                                                                                                                                                             | 90.8(3)    | O(5)-Cd(1)-O(6)                               | 54.5(3)    | O(7) <sup>#6</sup> -Cd(2)-N(1)                | 85.9(4)    | O(7) <sup>#6</sup> -Cd(2)-O(5)               | 92.1(4)    |
| N(3)-Cd(1)-O(4) <sup>#4</sup>                                                                                                                                                                                                                                                                                               | 90.6(4)    | O(4) <sup>#4</sup> -Cd(1)-O(6)                | 90.6(4)    | O(2)-Cd(2)-O(5)                               | 76.9(4)    | N(1)-Cd(2)-O(5)                              | 104.5(4)   |
| Symmetry codes: #3 <i>x</i> , <i>y</i> , <i>z</i> +1; #4 <i>x</i> +1, <i>y</i> , <i>z</i> ; #5 - <i>x</i> , - <i>y</i> , - <i>z</i> +1; #6 - <i>x</i> +1, - <i>y</i> , - <i>z</i> .                                                                                                                                         |            |                                               |            |                                               |            |                                              |            |
| <b>Complex 6</b>                                                                                                                                                                                                                                                                                                            |            |                                               |            |                                               |            |                                              |            |
| Cd(1)-O(3) <sup>#1</sup>                                                                                                                                                                                                                                                                                                    | 2.238(6)   | Cd(1)-O(2)                                    | 2.319(6)   | Cd(2)-N(4) <sup>#3</sup>                      | 2.248(5)   | Cd(2)-O(1)                                   | 2.349(6)   |
| Cd(1)-O(7) <sup>#2</sup>                                                                                                                                                                                                                                                                                                    | 2.238(5)   | Cd(1)-O(5)                                    | 2.321(5)   | Cd(2)-O(8) <sup>#4</sup>                      | 2.288(5)   | Cd(2)-O(2)                                   | 2.577(6)   |
| Cd(1)-N(1)                                                                                                                                                                                                                                                                                                                  | 2.260(6)   | Cd(2)-O(6)                                    | 2.230(5)   | Cd(2)-O(4) <sup>#5</sup>                      | 2.288(6)   | O(3) <sup>#1</sup> -Cd(1)-O(7) <sup>#2</sup> | 102.0(2)   |
| O(3) <sup>#1</sup> -Cd(1)-N(1)                                                                                                                                                                                                                                                                                              | 85.9(2)    | O(7) <sup>#2</sup> -Cd(1)-O(5)                | 89.0(2)    | O(6)-Cd(2)-O(4) <sup>#5</sup>                 | 87.9(2)    | O(4) <sup>#5</sup> -Cd(2)-O(1)               | 174.5(2)   |
| O(7) <sup>#2</sup> -Cd(1)-N(1)                                                                                                                                                                                                                                                                                              | 91.6(2)    | N(1)-Cd(1)-O(5)                               | 105.93(19) | N(4) <sup>#3</sup> -Cd(2)-O(4) <sup>#5</sup>  | 91.2(2)    | O(6)-Cd(2)-O(2)                              | 85.62(18)  |
| O(3) <sup>#1</sup> -Cd(1)-O(2)                                                                                                                                                                                                                                                                                              | 90.2(2)    | O(2)-Cd(1)-O(5)                               | 76.4(2)    | O(8) <sup>#4</sup> -Cd(2)-O(4) <sup>#5</sup>  | 88.4(2)    | N(4) <sup>#3</sup> -Cd(2)-O(2)               | 144.98(19) |
| O(7) <sup>#2</sup> -Cd(1)-O(2)                                                                                                                                                                                                                                                                                              | 161.6(2)   | O(6)-Cd(2)-N(4) <sup>#3</sup>                 | 93.7(2)    | O(6)-Cd(2)-O(1)                               | 93.9(2)    | O(8) <sup>#4</sup> -Cd(2)-O(2)               | 93.7(2)    |
| N(1)-Cd(1)-O(2)                                                                                                                                                                                                                                                                                                             | 103.08(19) | O(6)-Cd(2)-O(8) <sup>#4</sup>                 | 175.0(2)   | N(4) <sup>#3</sup> -Cd(2)-O(1)                | 93.9(2)    | O(4) <sup>#5</sup> -Cd(2)-O(2)               | 123.7(2)   |
| O(3) <sup>#1</sup> -Cd(1)-O(5)                                                                                                                                                                                                                                                                                              | 163.7(2)   | N(4) <sup>#3</sup> -Cd(2)-O(8) <sup>#4</sup>  | 89.7(2)    | O(8) <sup>#4</sup> -Cd(2)-O(1)                | 89.5(2)    | O(1)-Cd(2)-O(2)                              | 51.4(2)    |
| Symmetry codes: #1 - <i>x</i> +1, - <i>y</i> , - <i>z</i> +1; #2 - <i>x</i> , - <i>y</i> , - <i>z</i> +2; #3 <i>x</i> +1, - <i>y</i> +1/2, <i>z</i> +1/2; #4 <i>x</i> +1, <i>y</i> , <i>z</i> ; #5 <i>x</i> , <i>y</i> , <i>z</i> +1.                                                                                       |            |                                               |            |                                               |            |                                              |            |
